# Supplementary material for: Acute effects of voluntary isometric contractions at maximal shortening vs. ballistic stretching on flexibility, strength and jump
Source: PeerJ journal article supplement (doi:10.7717/peerj.17819), 2024-07-30
Supplement: Raw_data.xlsx [file Raw_data.xlsx]

## Sheet: CADERA-RODILLA
		PRE	POST	PRE	POST	PRE	POST	PRE	POST	PRE	POST	PRE	POST	PRE	POST	PRE	POST	PRE	POST
		AROM		AROM		AROM		AROM		FIM		FIM		FIM		FIM		CMJ
G1 BALLISTIC		HIP FLEX. R.		HIP FLEX. L.		KNEE FLEX. R.		KNEE FLEX. L.		HIP FLEX. R.		HIP FLEX. L.		KNEE FLEX. R.		KNEE FLEX. L.
	M1	114	116	111	112	106	107	113	115	13.2	12.9	15.1	15.5	20.4	21.4	20.3	21.1	29.62	30.27
	M2	136	140	127	129	121	125	118	119	14.3	15.3	13.8	14.8	14.1	14.7	11.3	11.4	23.17	23.48
	M3	121	125	123	127	105	107	112	112	20.1	21.1	22.7	23.4	19.9	19.5	19.8	20	20.32	20.75
	M4	132	135	125	129	119	120	115	117	22.7	22.7	21.3	21.7	10.1	10.4	9.7	9.5	16.36	16.61
	M5	115	117	113	114	113	113	111	114	13.6	13.6	13.2	13.1	15.3	15.7	13.4	14.2	18.13	18.32
	M6	123	128	125	126	110	112	108	109	16.7	17	17.5	17.7	14.8	15.8	18.1	18.5	17.04	17.44
	M7	127	131	120	121	116	117	106	107	12.3	12.2	12.1	12.3	16.8	17	17.6	18.1	19.53	19.77
	M8	119	120	126	130	110	113	110	112	19.5	20.5	20.9	21.1	10.9	10.9	11.7	11.6	15.61	15.85
	M9	128	133	124	125	112	115	104	107	21.6	21.4	18.6	18.4	16.4	16.4	17.2	17	18.06	18.55
	M10	121	123	116	119	114	117	108	109	19.3	19.3	17.9	18.6	12.6	13.5	12.1	12.2	19.36	19.78
	F1	114	115	121	123	110	112	112	115	13.8	13.9	13.8	14.8	10.2	10.4	9.8	10.2	14.31	14.61
	F2	131	134	130	131	119	120	116	118	13.3	14.1	16.8	17.6	9.6	9.6	9.7	9.9	21.32	21.42
	F3	114	115	106	108	103	107	101	104	18.7	19.1	19.6	19.7	19.2	20	16.3	16.3	15.87	16.29
	F4	121	125	126	128	112	114	109	111	13	13.3	11.6	12.2	9.6	9.7	8.2	7.9	10.83	11.09
	F5	125	130	121	125	114	117	107	108	11.9	12	11.7	11.4	11.5	11.7	10.7	10.6	13.81	14.73
	F6	122	123	120	122	101	103	105	108	15	15.9	15.5	15.8	11	11.7	13.7	13.8	14.5	14.87
	F7	114	117	109	111	107	111	112	113	14.3	14	17.5	17.5	15.5	16	17	17.5	18.13	18.17
	F8	117	122	114	115	117	122	118	119	14.7	15.6	11.8	11.8	13.3	13.7	9.2	9.7	15.5	15.98
	F9	127	128	123	124	119	120	116	119	14.7	14.5	15.4	16.3	13.5	13.5	12.1	11.8	9.78	9.79
	F10	111	113	113	115	106	108	113	114	13.9	14.4	16.9	16.6	12.6	13.2	13.9	13.6	12.83	13.08
		PRE	POST	PRE	POST	PRE	POST	PRE	POST	PRE	POST	PRE	POST	PRE	POST	PRE	POST	PRE	POST
		AROM		AROM		AROM		AROM		FIM		FIM		FIM		FIM		CMJ
G2 VICAMS		HIP FLEX. R.		HIP FLEX. L.		KNEE FLEX. R.		KNEE FLEX. L.		HIP FLEX. R.		HIP FLEX. L.		KNEE FLEX. R.		KNEE FLEX. L.
	M1	103	122	104	125	114	127	110	125	16.5	20.5	16.9	23.2	14.7	19.1	15.6	19.2	17.1	18.27
	M2	123	133	124	133	112	117	116	120	17.4	22.1	19.7	25.4	12.4	16.1	9.4	12.2	22.42	24.86
	M3	132	140	128	141	114	124	104	112	22.8	31	19.9	25.7	17.5	22.9	18.3	23.8	18.3	20.38
	M4	112	118	125	132	104	112	111	115	21.1	27.2	21.9	27.1	20.1	25.3	20	25.1	28.8	32.14
	M5	130	139	129	139	122	126	114	119	13.1	16.1	16.5	20.5	9.6	11.9	9.7	12.9	21.83	23.75
	M6	116	122	119	130	108	115	108	112	14.3	17.2	15.2	19.1	12.6	16.5	16	21.1	11.9	12.82
	M7	120	139	117	127	111	119	108	118	11.3	14.9	11.2	13.8	10.9	14.2	10.4	13.9	11.1	12.04
	M8	129	141	125	136	116	127	114	120	13.5	16.2	16.8	22	13.5	17.7	11.2	14.8	18.13	19.38
	M9	128	139	122	136	118	123	115	121	16.9	20.2	16.1	20.2	18.2	23	17.5	21.5	19.15	20.34
	M10	121	135	120	134	108	115	110	118	17.2	20.8	16.6	21.4	17.5	23.1	17.2	21.5	19.95	21.92
	F1	106	123	121	140	102	107	104	113	15.1	17.9	15.5	20.3	14	16.7	13.1	16.4	17.74	18.88
	F2	125	140	120	127	115	124	121	125	14.4	17.1	14.6	18.1	11.3	14.6	14.8	18.6	16.95	18.47
	F3	124	139	123	135	114	118	114	117	14.8	18.7	15.5	20.3	13.7	16.9	12.3	16.3	7.56	7.86
	F4	130	143	128	137	121	133	116	119	15.7	19	18.5	23.3	15.1	18.9	13.5	17.7	8.98	9.78
	F5	114	124	116	129	109	121	116	120	14.2	17.7	16.2	20	12.9	16.6	14.2	17.6	10.95	11.35
	F6	113	128	112	129	110	121	115	125	13.4	16.8	16.6	21.8	14.6	19	14.1	18.9	26.55	27.84
	F7	125	136	127	136	115	122	117	118	15.4	18.6	15.6	19.3	10.9	13.1	11.5	14.1	14.53	15.22
	F8	120	128	122	137	113	117	109	116	13.3	16.5	13.1	16.9	11.1	13.6	10.9	13.7	12.53	13.42
	F9	112	122	114	126	112	115	108	113	18.6	23.8	19.4	24.6	14.2	18	12.1	15	14.03	14.88
	F10	124	134	121	138	117	124	119	126	14.4	17.8	13.5	17.3	13	15.8	10.6	13.9	12.14	12.77
		PRE		PRE		PRE		PRE		PRE		PRE		PRE		PRE		PRE
		AROM		AROM		AROM		AROM		FIM		FIM		FIM		FIM		CMJ
G3 CONTROL		HIP FLEX. R.		HIP FLEX. L.		KNEE FLEX. R.		KNEE FLEX. L.		HIP FLEX. R.		HIP FLEX. L.		KNEE FLEX. R.		KNEE FLEX. L.
	M1	130	132	125	126	115	117	109	109	22.1	22.2	20.6	21	10.2	10.1	7.6	7.8	12.68	12.81
	M2	118	117	117	116	115	114	107	109	19.7	20.4	18.5	18.3	16.1	16.1	17	17.7	14.51	14.35
	M3	125	127	120	119	117	119	113	112	18.6	19.3	18	17.6	13.9	14.5	11.5	11.4	22.74	23.2
	M4	118	118	120	120	110	109	111	113	14.6	14.4	15.4	15.2	12.7	12.7	16	16	11.22	10.91
	M5	117	119	116	115	115	114	112	114	13.9	14.6	13.4	13	15.5	15.5	13.7	13.9	18.92	19.17
	M6	134	133	130	132	116	118	104	105	20.3	20.4	20.1	20.1	17.5	17.9	18.5	18.5	17.11	17.26
	M7	116	116	124	123	108	109	112	113	18.9	19.6	20.6	21.3	16.5	17.1	18.2	17.8	20.41	20.05
	M8	124	125	120	120	113	112	114	116	16.8	16.6	17.3	17.1	16	15.8	14.9	14.6	21.13	21.51
	M9	125	125	128	129	114	114	110	109	14.1	13.7	14.5	14.9	15.8	15.4	16	16.7	22.88	23.04
	M10	123	125	120	120	112	113	109	109	17.3	17.1	17.6	17.2	16.5	17.2	16.5	16.2	19.06	18.71
	F1	120	119	116	116	106	107	113	115	14.6	14.4	15	15.7	14.1	14.8	15.7	15.5	20.12	20.26
	F2	119	119	112	113	111	111	113	112	17.1	16.7	16.1	16.4	13.2	13	15.1	15.7	14.07	14
	F3	124	123	128	129	110	112	107	107	11.8	11.8	10.4	10.1	8.4	8.2	7	7	9.08	9.34
	F4	121	120	121	120	120	121	117	118	13.6	13.9	13.7	13.8	9.7	9.5	9.8	9.8	17.91	18.15
	F5	122	121	122	124	106	108	111	113	14.5	14.7	14.3	14.6	14.3	13.9	15.8	16	15.73	15.43
	F6	123	122	119	120	112	113	105	104	12.4	12.2	12.3	12.6	12	12.5	11.2	11.1	12.67	12.41
	F7	117	119	123	123	114	116	116	115	14.4	14.9	14.4	15.1	10.5	11	10.1	10.5	12.28	11.93
	F8	119	120	121	123	110	112	110	110	13	12.8	12.8	12.8	12.1	12.1	14	14.7	13.2	13.54
	F9	122	122	123	125	115	114	113	114	15.4	15.4	18.3	18	13.5	14.2	9.6	9.4	11.32	11.1
	F10	115	116	111	111	115	114	113	114	15.9	15.9	15	15.6	12.7	12.5	8.7	8.3	14.96	14.53
